# Supplementary material for: Selection and Evaluation of Reference Genes for Quantitative Real-Time Reverse-Transcriptase PCR under Cold Stress in Eggplant (Solanum melongena L.) during Fruit Development
Source: Research Square preprint supplement (doi:10.21203/rs.3.rs-79512/v1), 2020-11-10
Supplement: Supplementary file 1 [file 9818f179c14a87a9dd94ad10.xlsx]

## Sheet: Supplementary Table S1.
Supplementary Table S1 Ct values of 18 canidate reference genes on 72 biological samples.
Biological samples	D1	D2	D3	D4	D5	D6	D7	D8	D9	D10	D11	D12	D13	D14	D15	D16	D17	D18
P-10 dw 0d_1	15.74	19.23	21.3	15.24	13.67	18.62	18.22	16.34	16.22	18.55	15.29	17.99	17.87	17.93	14.73	17.87	14.39	19.4
P-10 dw 0d_2	15.71	19.35	22.12	15.11	13.48	18.83	19.17	19.08	17.41	19.51	14.42	17.69	17.64	19.29	16.2	20.01	17.35	23.45
P-10 dw 0d_3	16.11	19.79	22.28	15.71	14.37	18.66	18.5	16.98	15.93	18.43	15.98	18.53	18.52	18.75	15.57	19.01	15.18	21.05
P-10 dw 2d_1	15.44	18.86	21.95	15.46	13.71	18.8	19.13	19.01	17.06	18.82	15.42	17.63	18.43	19.2	15.43	19.06	15.93	21.86
P-10 dw 2d_2	15.61	19.35	21.63	15.6	13.97	19.38	19.39	17.18	16.58	18.63	16.58	19.11	19.32	19.21	16.33	19.87	15.59	21.65
P-10 dw 2d_3	15.09	18.61	21.4	15.18	13.5	18.88	18.97	18.94	17.19	18.97	16.09	17.89	18.73	19.6	17.19	20.63	17.13	23.56
P-10 dw 4d_1	16.31	19.85	22.89	16.3	14.84	18.17	19.92	18.1	16.85	18.88	17.02	19.37	19.34	19.37	17.32	20.93	16.33	21.81
P-10 dw 4d_2	15.24	18.61	21.87	15.46	14.08	18.25	19.24	19.21	17.3	19.03	15.66	17.7	18.78	19.54	17.28	20.81	17.45	23.87
P-10 dw 4d_3	16.14	19.61	22.62	16.2	14.49	19.27	19.72	18.19	16.45	18.69	16.8	18.96	19.51	19.41	16.67	20.29	16.19	22.32
P-10 dw 10d_1	15.07	18.38	21.69	14.96	13.91	18.32	19.07	18.83	16.75	18.41	16.79	18.04	19.47	19.34	17.35	20.66	17.71	23.89
P-10 dw 10d_2	15.68	19.81	22.54	16.29	14.49	20.33	20.49	19.33	17.42	19.12	17.8	18.82	19.5	19.8	17.76	21.23	16.89	22.5
P-10 dw 10d_3	16.51	19.85	23.6	17.2	15.28	19.85	20.79	20.77	18.57	20.25	17.64	17.79	19.99	21.42	18.88	22.79	17.73	25.24
P-10 dw 15d_1	16.09	19.35	21.83	14.04	14.9	17.88	16.76	18.7	14.49	18.36	14.04	16.37	18	15.5	15.31	18.66	16.77	21.32
P-10 dw 15d_2	15.33	18.47	20.44	13.53	13.11	18.09	17.8	17.54	13.76	17.63	15.63	17.16	17.66	17.23	14.89	16.9	16.34	19.86
P-10 dw 15d_3	15.76	18.81	21	13.94	14.28	18.06	16.52	18.49	14.5	17.94	14.5	16.86	18.33	15.97	16.32	19.43	17.48	21.93
P-10 dw 20d_1	16.96	20.74	22.78	15.52	14.24	19.9	20.71	20.17	16.29	18.79	17.48	17.67	19.69	18.29	15.69	18.78	16.92	19.15
P-10 dw 20d_2	15.58	19.51	21.49	14.85	13.99	18.87	18.44	19.11	15.79	18.67	15.55	16.82	19.18	16.73	16.76	20.05	17.48	21.11
P-10 dw 20d_3	17.91	21.94	24.45	16.75	15.65	21.51	22.05	21.12	17.35	20.33	18.61	18.61	21.09	20.07	18.21	21.5	18.84	23.38
P-10 cw 0d_1	17.6	21.31	24.24	17.38	15.68	20.36	21.12	19.85	18.04	20.19	18.58	20.82	20.43	20.72	18.35	21.63	17.62	23.15
P-10 cw 0d_2	16.16	20.74	23.16	16.51	15	18.8	19.76	19.84	17.65	19.46	16.95	18.77	20.09	20.84	18.55	22.17	18.16	24.95
P-10 cw 0d_3	16.11	19.81	22.15	15.97	14.36	18.98	19.21	18.04	16.6	18.6	16.86	19.25	18.74	19.62	16.86	20.23	16.77	22.63
P-10 cw 2d_1	14.77	18.96	21.49	15.73	13.85	18.82	19.11	19.29	16.99	18.72	15.16	16.74	18.52	19.36	17.08	20.24	17.21	23.06
P-10 cw 2d_2	16.67	19.47	22.37	16.22	14.34	19.5	20.1	18.55	16.83	18.94	17.65	20.2	19.7	19.99	17.26	20.2	17.11	22.92
P-10 cw 2d_3	16.38	18.96	22.92	16.19	15.18	18.84	19.6	19.48	17.44	18.93	16.12	18.47	19.68	20.43	17.81	21.37	18.14	24.65
P-10 cw 4d_1	15.83	18.66	21.67	15.89	14.29	18.87	19.2	18.07	16.09	18.05	15.96	18.7	18.47	18.68	16.29	19.33	16.49	22.05
P-10 cw 4d_2	15.53	18.52	21.82	15.91	14	18.01	18.77	18.87	16.52	18.23	15.11	17.23	19.3	19.77	16.76	20.26	17.09	23.71
P-10 cw 4d_3	16.39	19.03	22.11	16.12	14.16	19.7	19.98	18.93	16.55	18.54	16.46	19.55	19.33	18.61	16.61	19.21	16.19	21.86
P-10 cw 10d_1	15.07	18.17	21.72	15.35	14	18.39	18.73	18.61	16.82	17.88	15.51	17.07	19.07	19.24	16.76	20.17	16.96	23.21
P-10 cw 10d_2	16.69	20.11	23.48	16.48	15.15	20.97	20.76	19.49	17.18	18.55	16.77	19.1	18.99	19.14	16.12	18.44	15.71	21.65
P-10 cw 10d_3	15.35	18.63	22.18	15.66	14.22	18.58	18.89	18.84	16.86	18.06	15.29	16.99	19.34	19.63	17.12	20.58	17.08	23.44
P-10 cw 15d_1	15	18.74	20.58	14.62	13.69	17.49	17.58	17.77	14.9	18.43	14.53	16.92	18.56	16.39	15.16	18.54	15.93	21.48
P-10 cw 15d_2	15.32	18.84	20.3	14.33	13.12	19.52	19.27	19.02	15.47	18.78	14.35	16.81	18.17	17.57	15.38	18.32	16.52	21.39
P-10 cw 15d_3	14.79	17.75	19.58	14.18	13.5	19.08	19.02	19.61	15.99	19.68	14.42	17.02	18.48	15	15.77	19.09	16.66	23.01
P-10 cw 20d_1	15.61	18.77	20.74	14.6	13.27	19.26	19.25	19.52	15.55	18.52	15.21	17.21	18.75	17.91	16.12	18.95	16.44	22.19
P-10 cw 20d_2	14.58	18.24	20.14	14.58	13.59	18.57	18.69	19.08	15.96	19.37	15.24	17.1	18.26	15.84	15.85	19.14	16.66	23.13
P-10 cw 20d_3	14.86	18.82	20.98	14.65	13.02	19.57	19.5	18.94	16.01	18.13	14.6	17.6	17.87	18.23	16.4	18.95	17.65	21.66
03-2 dw 0d_1	15.67	19.51	20.48	15.78	14.38	17.6	18.12	18.07	15.33	17.86	16.2	17.22	17.54	17.72	14.7	19.48	15.08	23.22
03-2 dw 0d_2	17.07	20.21	22.39	15.36	14.83	18.07	18.62	19.33	16.36	17.89	17.23	18.94	19.69	18.94	14.23	19.41	16	21.51
03-2 dw 0d_3	15.38	19.24	20.2	15.67	14.1	17.26	17.75	17.81	15	17.46	16.06	16.66	17.21	18.06	15.49	19.96	15.79	24.03
03-2 dw 2d_1	18.14	21.73	24.23	16.57	16.32	19.1	19.78	21.35	17.33	19.48	19.13	19.2	20.42	19.55	15.42	21.44	17.01	23.11
03-2 dw 2d_2	16.49	20.99	23.4	16.91	16.06	19.58	19.75	20.12	16.58	19.63	19.23	19.16	19.33	20.47	17.32	21.98	16.59	26.03
03-2 dw 2d_3	15.9	19.69	21.75	14.85	14.16	17.53	17.94	18.75	15.57	17.18	16.7	17.47	19.01	18	13.9	19.07	16.11	21.08
03-2 dw 4d_1	16.93	21.26	23.43	17.6	16.2	19.21	20.6	20.62	16.96	19.87	19.19	18.35	19.42	20.34	17.59	21.91	17.09	25.89
03-2 dw 4d_2	16.13	20.32	22.42	15.64	14.51	17.55	18.79	19.8	16.06	18.09	17.98	17.37	19.26	18.84	14.71	20.32	15.4	21.9
03-2 dw 4d_3	16.37	20.92	23.02	17.21	15.38	18.8	19.76	19.54	16.72	19.21	19.02	18.29	18.91	19.69	17.03	21.23	16.16	24.99
03-2 dw 10d_1	16.66	20.17	22.08	15.36	14.73	17.45	18.72	19.21	16.06	18.14	17.06	17.61	19.32	18.64	13.99	19.79	16.47	22.02
03-2 dw 10d_2	14.99	19.11	20.19	14.96	13.48	17.48	18.1	17.49	14.97	17.41	16.14	17.96	17.56	17.78	15.14	19.88	16.32	24.49
03-2 dw 10d_3	16.07	20.22	21.92	15.33	14.69	18.69	19.08	19.78	16.3	18.21	18.17	18.1	19.64	19.56	14.19	19.66	15.93	21.85
03-2 dw 15d_1	14.86	18.58	20.24	14.3	13.54	17.79	17.3	18.51	14.75	18.17	14.86	16.78	17.86	15.93	15.81	19.22	16.35	22.62
03-2 dw 15d_2	16.63	20.13	22.39	15.76	14.58	17.94	18.03	17.35	14.04	17.38	16.19	17.88	18.98	19.49	17.35	20.27	18.17	23.46
03-2 dw 15d_3	15.69	19.85	22.65	16.02	14.83	16.98	16.97	17.38	14.18	17.49	17.24	17.99	19.51	17.36	17.34	21.68	17.65	24.44
03-2 dw 20d_1	16.64	19.78	22.77	15.52	14.7	17.76	18.14	17.63	14.02	17.29	15.78	17.77	18.21	19.49	17.12	20.17	17.55	21.66
03-2 dw 20d_2	15.14	18.88	21.4	15.28	14.28	17.58	17.09	17.78	14.65	18.1	16.86	17.68	19.09	16.63	16.8	21.03	17.39	23.38
03-2 dw 20d_3	15.74	19.51	22.28	14.84	14.48	18.56	18.45	18.08	14.61	17.46	16.38	18.24	19.05	19.77	17.75	20.61	17.75	21.78
03-2 cw 0d_1	18.03	21.61	25.19	18.39	16.67	20.89	20.55	21.25	17.78	20.63	18.15	19.13	19.86	20.02	18.22	22.63	18.24	27.19
03-2 cw 0d_2	17.25	20.58	23.36	16.31	15.66	18.61	19.55	20.29	16.52	19.17	16.53	17.77	19.51	19.4	15.27	20.43	16.67	21.78
03-2 cw 0d_3	17.19	20.3	23.58	17.18	15.53	19.11	19.36	20.3	16.73	19.42	18.43	19.02	19.6	19.4	17.58	21.86	17.53	26.65
03-2 cw 2d_1	15.83	18.78	20.68	14.34	13.64	17.17	17.9	18.35	14.68	17.33	16.32	16.77	18.92	18.19	13.48	18.46	15.57	20.7
03-2 cw 2d_2	16.06	19.34	21.67	16.01	14.29	17.91	18.37	18.56	15.16	18.11	16.84	18.21	18.37	18.3	15.97	19.82	16.43	25.12
03-2 cw 2d_3	15.6	18.84	20.84	14.3	13.61	17.5	18.29	18.58	14.69	17.31	15.8	16.06	19.4	18.39	13.82	18.08	15.11	20.17
03-2 cw 4d_1	16.07	19.59	21.97	15.9	14.17	18.16	18.29	18.82	15.31	18.25	15.98	17.74	17.61	17.65	16.17	19.78	16.2	25.42
03-2 cw 4d_2	15.68	18.88	20.98	14.6	13.88	17.31	17.9	18.21	14.54	17.65	15.21	16.15	18.21	17.9	13.43	17.59	15.18	19.58
03-2 cw 4d_3	15.86	19.02	21.58	15.48	13.6	17.23	17.11	18.15	14.66	17.42	15.84	17.26	17.55	17.35	15.46	19.58	15.9	24.87
03-2 cw 10d_1	15.58	19.7	21.52	15.08	13.83	17.85	19.02	19.09	15.15	18.45	15.82	16.62	18.8	18.71	14.82	18.27	15.39	21.33
03-2 cw 10d_2	15.28	18.76	20.79	15.32	13.35	17.24	17.22	17.46	14.62	17.58	15.61	17.13	17.32	16.48	14.56	18.46	14.67	23.93
03-2 cw 10d_3	15.38	19.35	21.38	14.96	13.73	17.48	18.3	18.94	14.93	18.16	15.76	16.55	18.77	18.98	14.67	17.72	14.59	22.1
03-2 cw 15d_1	14.85	18.72	20.59	15.51	14	17.91	17.61	17.87	14.79	18.59	15.16	16.75	18.28	16.23	15.96	19.35	16.46	23.72
03-2 cw 15d_2	15.83	20.21	22.61	16.22	14.55	19.39	19.41	18.94	15.8	18.72	16.35	18.17	19.26	20.35	17.61	20.31	17.72	22.85
03-2 cw 15d_3	15.32	18.73	20.92	15.38	13.83	18.13	17.68	17.96	14.91	18.81	15.99	17.04	18.79	16.55	16.16	19.59	16.01	23.79
03-2 cw 20d_1	15.42	19.49	21.93	15.66	13.82	19.27	19.17	18.47	15.38	17.94	15.41	17.64	18.87	19.86	17.04	19.26	17.24	21.13
03-2 cw 20d_2	14.85	18.56	20.36	15.17	14.23	17.74	17.62	17.68	14.5	18.6	15.18	16.62	18.14	15.66	15.02	18.53	16.41	23.01
03-2 cw 20d_3	15.2	19.35	22.09	15.47	14	19.44	19.26	18.38	15.49	17.52	15.05	17.47	18.6	19.91	16.49	18.36	17	21.01
Mean	15.8996	19.4939	21.9276	15.5826	14.3336	18.5868	18.8754	18.8165	15.9512	18.5007	16.3183	17.824	18.8704	18.6001	16.191	19.8679	16.6281	22.7681
P-10 and 03-2 are two plant materials; "dw" means samples under cold stress; "cw" means samples under normal temperature, D1~D18 are candidate reference genes; 0d, 2d, 4d, 10d, 15d, 20d are days past anthesis; _1, _2, _3 are biological replicate numbers.
